# Supplementary material for: Integration of network-like porous NiMoO4 nanoarchitectures assembled with ultrathin mesoporous nanosheets on three-dimensional graphene foam for highly reversible lithium storage
Source: Royal Society of Chemistry journal article supplement (doi:10.1039/c5ta02795k), 2015-01-01
Supplement: c5ta02795k1.pdf [file c5ta02795k1.pdf]

## Supporting Information

Integration of network-like porous NiMoO<sub>4</sub> nanoarchitectures  
assembled with ultrathin mesoporous nanosheets on three-  
dimensional graphene foam for highly reversible lithium storage

Bo Wang, Songmei Li,\* Xiaoyu Wu, Wenming Tian, Jianhua Liu, and Mei Yu

Key Laboratory of Aerospace Advanced Materials and Performance of Ministry of  
Education, School of Materials Science and Engineering, Beihang University, Beijing,  
100191, P. R. China

\* Corresponding author. Tel: +86 10 82317103; fax: +86 10 82317103.

E-mail address: songmei\_li@buaa.edu.cn.

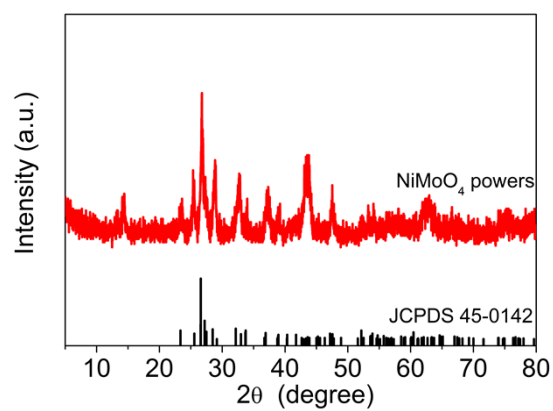

**Fig. S1** The typical XRD pattern of NiMoO<sub>4</sub> powders.

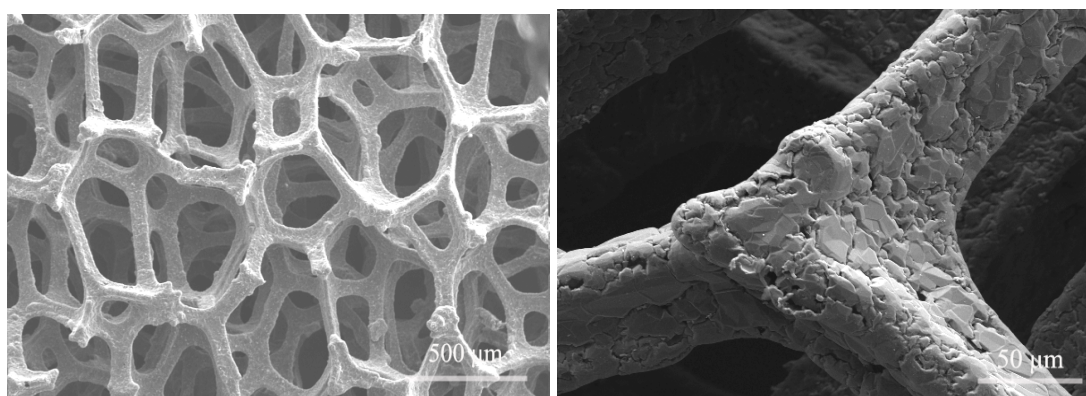

**Fig. S2** SEM images of as-prepared 3DGF at different magnifications.

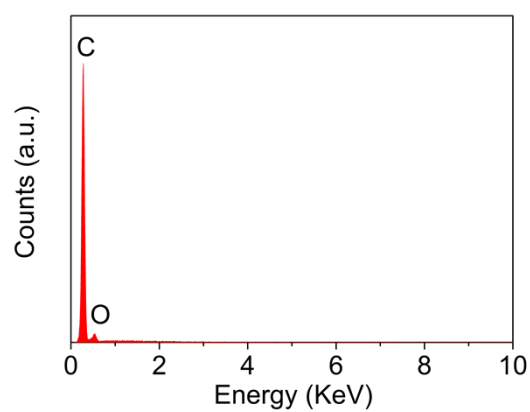

**Fig. S3** EDS spectrum of as-prepared 3DGF.

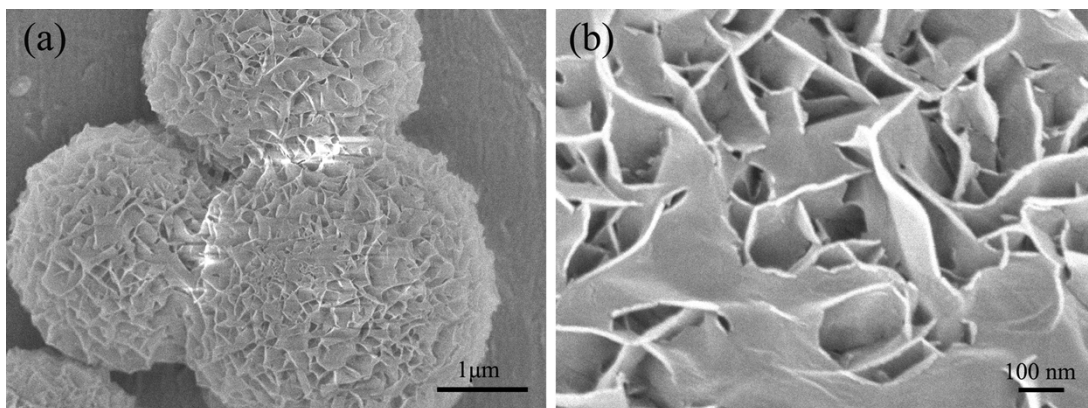

**Fig. S4** The SEM images (a and b) of NiMoO<sub>4</sub> nanosheets spheres grown in solution without GF substrate at different magnifications.

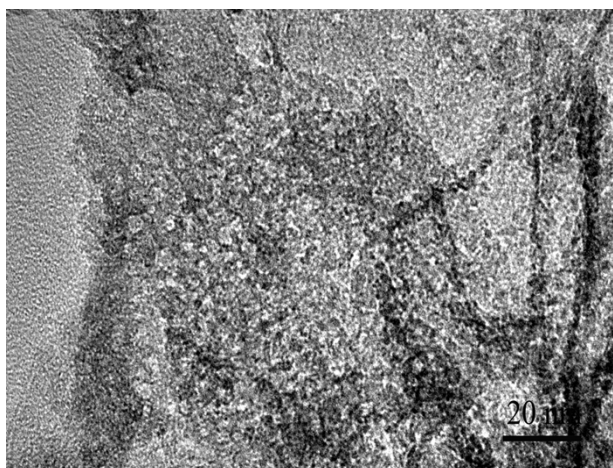

**Fig. S5** The higher magnification TEM image of the NiMoO<sub>4</sub> nanosheets revealing the mesoporous feature.

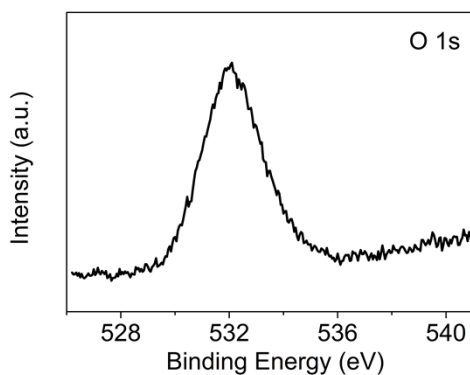

**Fig. S6** XPS spectra of O 1s for NiMoO<sub>4</sub>@3DGF composites.

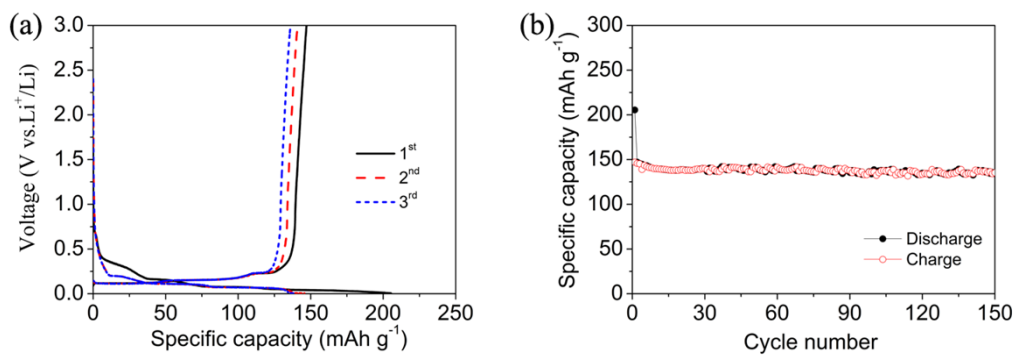

**Fig. S7** (a) Galvanostatic charge-discharge voltage profiles of 3DGF electrode for the first three cycles at a current density of  $200 \text{ mA g}^{-1}$ , (b) Cycling performance of 3DGF electrode at the current density of  $200 \text{ mA g}^{-1}$ .
